# Supplementary material
Source: bioRxiv or medRxiv preprint supplement (https://www.medrxiv.org/highwire/filestream/69147/field_highwire_adjunct_files/0/19006676-1.pdf)
Supplement: Supplementary file [file 19006676-1.pdf]

## SUPPLEMENTARY MATERIAL

|                                                         | bvAD        | tAD         | bvFTD       | CN <sub>2</sub> | p-value |
|---------------------------------------------------------|-------------|-------------|-------------|-----------------|---------|
| n                                                       | 19          | 18          | 18          | 31              |         |
| Age, y                                                  | 66.1 (7.4)  | 64.7 (9.6)  | 63.7 (5.7)  | 65.5 (8.0)      | 0.80    |
| Sex, no. male (%)                                       | 11 (58)     | 9 (50)      | 14 (78)     | 19 (61)         | 0.82    |
| Education, y mean (SD)                                  | 15.8 (2.4)  | 16.2 (3.0)  | 15.5 (3.4)  | -               | 0.76    |
| MMSE †, mean (SD)                                       | 21.8 (5.7)  | 21.5 (5.7)  | 21.8 (7.1)  | -               | 0.99    |
| APOEε4 positivity <sup>a</sup> ,<br>no. of patients (%) | 7/13 (54)   | 9/11 (82)   | 3/18 (17)   | -               | <0.01   |
| Scanner type <sup>b</sup>                               |             |             |             |                 | <0.001  |
| ECAT                                                    | 15 (79)     | 18 (100)    | 13 (72)     | 12 (39)         |         |
| BIO                                                     | 4 (21)      | 0 (0)       | 5 (28)      | 19 (61)         |         |
| Memory domain z-score <sup>c °</sup> ,<br>mean (SD)     | -3.2 (1.5)  | -4.0 (1.3)  | -2.2 (1.7)  | -               | <0.01   |
| Executive domain z-score <sup>°</sup> ,<br>mean (SD)    | -1.6 (1.0)  | -1.8 (1.0)  | -1.7 (1.0)  | -               | 0.88    |
| NPI score <sup>d ◊</sup> , mean (SD)                    | 31.8 (23.2) | 11.5 (13.5) | 37.2 (19.7) | -               | <0.01   |

**Table S1.** Demographic, neuropsychological and neuropsychiatric characteristics across groups based on the subset of individuals with FDG-PET data available.

Differences between groups were assessed using ANOVA tests, Chi-square tests and Kruskal-Wallis tests with post hoc Mann-Whitney U-tests, where appropriate.

All p-values were corrected for multiple comparisons using Bonferroni correction.

<sup>a</sup> MMSE data was available for n=13 for bvAD, n=13 for tAD, n=17 for bvFTD and n=0 for CN<sub>2</sub>

<sup>°</sup> Cognition data was available for n=15 for bvAD, n=18 for tAD, n=15 for bvFTD, n=0 for CN<sub>2</sub> and assessed using a MANOVA with Bonferroni correction.

<sup>◊</sup> NPI data was available for n=8 for bvAD, n=4 for tAD, n=10 for bvFTD and n=0 for CN<sub>2</sub>

<sup>a</sup> tAD & bvAD > bvFTD, p<0.05

<sup>b</sup> tAD < bvFTD, p<0.01

<sup>c</sup> Controls > patients, p<0.001

<sup>d</sup> bvFTD > tAD, p<0.01

|                                                         | bvAD        | tAD         | bvFTD       | CN <sub>1</sub> | p-value |
|---------------------------------------------------------|-------------|-------------|-------------|-----------------|---------|
| n                                                       | 15          | 14          | 18          | 19              |         |
| Age, y                                                  | 66.2 (8.8)  | 61.6 (6.9)  | 64.2 (5.1)  | 67.2 (9.7)      | 0.22    |
| Sex, no. male (%)                                       | 8 (53)      | 6 (43)      | 13 (72)     | 12 (63)         | 0.37    |
| Education, y mean (SD)                                  | 15.5 (2.8)  | 16.8 (3.3)  | 15.6 (3.4)  | 17.2 (2.3)      | 0.26    |
| MMSE <sup>a †</sup> , mean (SD)                         | 21.9 (5.8)  | 20.4 (6.3)  | 21.4 (7.3)  | 29.3 (0.8)      | <0.001  |
| APOEε4 positivity <sup>b</sup> ,<br>no. of patients (%) | 9/13 (69)   | 4/4 (100)   | 3/18 (17)   | 1/19 (5)        | <0.001  |
| Scanner type                                            |             |             |             |                 | 0.33    |
| 1.5T                                                    | 4 (27)      | 3 (21)      | 2 (11)      | 7 (37)          |         |
| 3T                                                      | 11 (73)     | 11 (79)     | 16 (89)     | 12 (63)         |         |
| Memory domain z-score <sup>c °</sup> ,<br>mean (SD)     | -3.4 (1.6)  | -4.1 (1.1)  | -2.3 (1.8)  | 0.3 (0.8)       | <0.001  |
| Executive domain z-score <sup>d °</sup> ,<br>mean (SD)  | -2.0 (1.1)  | -1.7 (1.1)  | -1.8 (1.0)  | -0.1 (0.6)      | <0.001  |
| NPI score <sup>δ</sup> , mean (SD)                      | 31.8 (23.2) | 11.5 (13.5) | 37.2 (19.7) | -               | 0.11    |

**Table S2.** Demographic, neuropsychological and neuropsychiatric characteristics across groups based on the subset of individuals with FLAIR data available.

Differences between groups were assessed using ANOVA tests, Chi-square tests and Kruskal-Wallis tests with post hoc Mann-Whitney U-tests, where appropriate.

All p-values were corrected for multiple comparisons using Bonferroni correction.

<sup>†</sup> MMSE data was available for n=12 for bvAD, n=10 for tAD, n=17 for bvFTD and n=19 for CN<sub>1</sub>.

<sup>°</sup> Cognition data was available for n=15 for bvAD, n=6 for tAD, n=16 for bvFTD, n=17 for CN<sub>1</sub> and assessed using a MANOVA with Bonferroni correction.

<sup>◇</sup> NPI data was available for n=8 for bvAD, n=4 for tAD, n=10 for bvFTD and n=0 for CN<sub>1</sub>.

<sup>a</sup> Controls > patients,  $p < 0.05$ .

<sup>b</sup> Controls < tAD & bvAD,  $p < 0.001$ , tAD & bvAD > bvFTD,  $p < 0.01$ .

<sup>c</sup> Controls > patients,  $p < 0.001$ .

<sup>d</sup> Controls > bvAD & bvFTD,  $p < 0.001$ , controls > tAD,  $p < 0.01$ .

|      | bvAD | tAD  | bvFTD | CN <sub>2</sub> |
|------|------|------|-------|-----------------|
| pDMN | 3.85 | 4.14 | 2.04  | 1.38            |
| aDMN | 4.13 | 2.92 | 4.13  | 2.60            |
| SAL  | 1.05 | 0.62 | 2.90  | 0.76            |
| ECN  | 2.20 | 3.11 | 2.78  | 1.92            |

**Table S3.** Goodness-of-fit (GOF) scores indicating the resemblance of the FDG interregional covariance maps with the functional network templates by Shirer et al. (2012).

GOF scores represent the subtraction of the mean  $T$ -score outside of the network template from the mean  $T$ -score within the network template, and GOF ratios represent the division of the mean  $T$ -score inside the network template by the mean  $T$ -score outside the network template. *pDMN* = posterior default mode network; *aDMN* = anterior default mode network; *SAL* = salience network; *ECN* = executive control network.

|      | bvAD | tAD  | bvFTD | CN <sub>2</sub> |
|------|------|------|-------|-----------------|
| pDMN | 1.49 | 1.27 | 0.77  | 0.88            |
| aDMN | 2.09 | 1.41 | 2.09  | 1.37            |
| SAL  | 0.71 | 0.74 | 1.82  | 0.83            |
| ECN  | 2.46 | 3.57 | 3.02  | 1.31            |

**Table S4.** Goodness-of-fit (GOF) scores and ratios indicating the resemblance of the FDG interregional covariance maps with the functional network templates by Neurosynth.org.

GOF scores represent the subtraction of the mean  $T$ -score outside of the network template from the mean  $T$ -score within the network template, and GOF ratios represent the division of the mean  $T$ -score inside the network template by the mean  $T$ -score outside the network template. *pDMN* = posterior default mode network; *aDMN* = anterior default mode network; *SAL* = salience network; *ECN* = executive control network.

|                                   | bvAD         | tAD          | bvFTD        | CN <sub>1</sub> |
|-----------------------------------|--------------|--------------|--------------|-----------------|
| n                                 | 29           | 28           | 28           | 34              |
| Hippocampus <sup>a</sup>          | 5.85 (1.10)  | 5.45 (0.76)  | 5.49 (1.09)  | 6.55 (0.87)     |
| Amygdala <sup>b</sup>             | 2.73 (0.39)  | 2.33 (0.46)  | 2.45 (0.66)  | 2.82 (0.40)     |
| Nucleus<br>Accumbens <sup>c</sup> | 0.72 (0.22)  | 0.73 (0.21)  | 0.51 (0.18)  | 0.91 (0.21)     |
| Caudate<br>nucleus <sup>d</sup>   | 6.11 (0.86)  | 6.07 (0.59)  | 5.70 (0.92)  | 6.54 (0.70)     |
| Pallidum <sup>e</sup>             | 3.48 (0.57)  | 3.48 (0.43)  | 3.12 (0.59)  | 3.63 (0.33)     |
| Putamen <sup>f</sup>              | 8.82 (1.50)  | 8.89 (0.77)  | 8.22 (1.34)  | 9.70 (0.90)     |
| Thalamus <sup>g</sup>             | 14.71 (1.82) | 14.37 (1.29) | 14.44 (1.74) | 15.85 (1.16)    |

**Table S5.** Deep gray matter volumes of subcortical structures across groups, presented as mean volume in cm<sup>3</sup>.

<sup>a</sup> Controls > patients,  $p < 0.001$

<sup>b</sup> Controls > tAD,  $p = 0.001$ , controls > bvFTD,  $p < 0.05$ , bvAD > tAD,  $p < 0.05$

<sup>c</sup> Controls > tAD,  $p < 0.05$ , controls > bvFTD,  $p < 0.001$ , bvFTD < tAD,  $p < 0.05$

<sup>d</sup> Controls > bvAD,  $p < 0.05$ , controls > bvFTD,  $p < 0.001$

<sup>e</sup> Controls > bvFTD,  $p < 0.001$ , bvFTD < bvAD & tAD,  $p < 0.05$

<sup>f</sup> Controls > bvFTD,  $p < 0.001$ , controls > bvAD,  $p = 0.01$

<sup>g</sup> Controls > bvAD,  $p < 0.01$ , controls > tAD,  $p < 0.05$ , controls > bvFTD,  $p < 0.001$

|                                                          | bvAD              | tAD               | bvFTD            | CN <sub>1</sub>  |
|----------------------------------------------------------|-------------------|-------------------|------------------|------------------|
| n                                                        | 15                | 14                | 18               | 19               |
| Total lobe <sup>a</sup>                                  | 4.06 [0.99-7.12]  | 4.43 [1.90-6.97]  | 5.06 [1.93-8.19] | 0.65 [0.38-0.93] |
| Frontal lobe <sup>a</sup>                                | 1.62 [0.31-2.94]  | 1.87 [0.80-2.94]  | 2.73 [0.86-4.60] | 0.32 [0.18-0.46] |
| Parietal lobe <sup>a</sup>                               | 1.68 [-0.03-3.39] | 1.81 [-0.11-3.73] | 1.26 [0.12-2.41] | 0.11 [0.05-0.17] |
| Occipital lobe <sup>b</sup>                              | 0.60 [0.10-1.09]  | 0.77 [0.31-1.23]  | 0.45 [0.21-0.69] | 0.13 [0.05-0.22] |
| Temporal lobe <sup>a</sup>                               | 0.61 [0.05-1.18]  | 0.58 [0.15-1.01]  | 0.62 [0.22-1.03] | 0.07 [0.03-0.11] |
| Basal Ganglia<br>& Infratentorial<br>region <sup>a</sup> | 0.09 [-0.01-0.19] | 0.16 [0.04-0.29]  | 0.07 [0.03-0.10] | 0.01 [0.01-0.02] |

**Table S6.** Total and regional white matter hyperintensity volumes, presented as mean volume in cm<sup>3</sup> [95%CI].

<sup>a</sup> Controls < patients,  $p < 0.01$

<sup>b</sup> Controls < bvAD & tAD,  $p < 0.01$

|                  |                                        | bvAD                          | tAD         | bvFTD       | CN1         | CN2         |   |
|------------------|----------------------------------------|-------------------------------|-------------|-------------|-------------|-------------|---|
| MRI <sup>o</sup> | n                                      | 29                            | 28          | 28          | 34          | -           |   |
|                  | Temporoparietal cortex <sup>a</sup>    | 0.37 (0.07)                   | 0.37 (0.06) | 0.41 (0.07) | 0.49 (0.04) | -           |   |
|                  | Total parietal cortex <sup>b</sup>     | 0.26 (0.05)                   | 0.26 (0.05) | 0.30 (0.05) | 0.34 (0.03) | -           |   |
|                  | Hippocampus <sup>c</sup>               | 0.33 (0.05)                   | 0.31 (0.05) | 0.32 (0.07) | 0.40 (0.03) | -           |   |
|                  | FTD signature region <sup>d</sup>      | 0.31 (0.06)                   | 0.33 (0.04) | 0.27 (0.06) | 0.38 (0.03) | -           |   |
|                  | Amygdala <sup>e</sup>                  | 2.73 (0.39)                   | 2.33 (0.46) | 2.47 (0.65) | 2.82 (0.39) |             |   |
| FDG <sup>†</sup> | n                                      | 19                            | 18          | 18          | -           | 31          |   |
|                  | Temporoparietal cortex <sup>f</sup>    | 1.00 (0.13)                   | 0.99 (0.11) | 1.11 (0.14) | -           | 1.22 (0.09) |   |
|                  | Total parietal cortex <sup>g</sup>     | 0.96 (0.13)                   | 0.94 (0.16) | 1.10 (0.11) | -           | 1.16 (0.10) |   |
|                  | FTD signature region <sup>h</sup>      | 0.93 (0.11)                   | 0.97 (0.10) | 0.82 (0.21) | -           | 1.05 (0.08) |   |
|                  | Posterior DMN <sup>i</sup>             | 1.00 (0.14)                   | 0.99 (0.13) | 1.18 (0.06) | -           | 1.17 (0.04) |   |
|                  | Anterior DMN <sup>j</sup>              | 0.98 (0.10)                   | 1.04 (0.10) | 0.80 (0.16) | -           | 0.97 (0.04) |   |
|                  | Salience Network <sup>k</sup>          | 1.05 (0.09)                   | 1.09 (0.7)  | 0.90 (0.16) | -           | 1.07 (0.04) |   |
|                  | Executive Control Network <sup>l</sup> | 0.98 (0.09)                   | 0.99 (0.08) | 1.00 (0.11) | -           | 1.08 (0.03) |   |
|                  | FLAIR <sup>□</sup>                     | n                             | 15          | 14          | 18          | 19          | - |
|                  |                                        | Total WMH volume <sup>m</sup> | 2.84 (4.43) | 2.65 (2.26) | 3.84 (4.38) | 1.19 (1.82) |   |

**Table S7.** Overview of results per modality included in the area-under-the-curve analysis per diagnostic group.

◇ MRI data presented were analyzed with a MANCOVA with Bonferroni correction, correcting for age, sex, scanner field strength and total intracranial volume.

† FDG data presented above were analyzed with MANCOVA with Bonferroni correction, correcting for age, sex and scanner type.

□ WMH data presented above are presented in  $\text{cm}^3$  and were tested with Kruskal-Wallis and post hoc Mann-Whitney U tests, with manual Bonferroni correction ( $p < 0.008$ ).

<sup>a</sup> Controls > patients,  $p < 0.001$ , bvAD < bvFTD,  $p = 0.01$

<sup>b</sup> Controls > patients,  $p < 0.001$ , bvAD < bvFTD,  $p < 0.01$

<sup>c</sup> Controls > patients,  $p < 0.001$

<sup>d</sup> Controls > bvAD & bvFTD,  $p < 0.001$ , Controls > tAD,  $p < 0.05$

<sup>e</sup> Controls > tAD,  $p = 0.001$ , controls > bvFTD,  $p < 0.05$ , bvAD > tAD,  $p < 0.05$

<sup>f</sup> Controls > tAD & bvAD,  $p < 0.001$ , controls > bvFTD,  $p < 0.05$ , tAD < bvFTD,  $p < 0.05$

<sup>g</sup> Controls > tAD & bvAD,  $p < 0.001$ , tAD < bvFTD,  $p < 0.05$

<sup>h</sup> Controls > tAD & bvAD,  $p < 0.05$ , controls > bvFTD,  $p < 0.001$

<sup>i</sup> Controls > bvAD & tAD,  $p < 0.001$ , bvAD & tAD < bvFTD,  $p < 0.001$

<sup>j</sup> Controls > bvFTD,  $p < 0.001$ , bvAD & tAD > bvFTD,  $p < 0.001$

<sup>k</sup> Controls > bvFTD,  $p < 0.001$ , bvAD & tAD > bvFTD,  $p < 0.001$

<sup>l</sup> Controls > tAD & bvFTD,  $p < 0.001$ , controls > bvAD,  $p < 0.01$

<sup>m</sup> Controls < bvFTD,  $p < 0.01$ , assessed with Kruskal-Wallis test ( $p = 0.008$ )



| bvAD vs. bvFTD |                  |         | bvAD vs. tAD |                  |         | tAD vs. bvFTD |                  |         |
|----------------|------------------|---------|--------------|------------------|---------|---------------|------------------|---------|
| Measure        | AUC (95% CI)     | p-value | Measure      | AUC (95% CI)     | p-value | Measure       | AUC (95% CI)     | p-value |
| 1 FDG pDMN     | 0.91 (0.80-1.00) | <0.001  | MRI AMYG     | 0.75 (0.62-0.88) | <0.01   | FDG pDMN      | 0.92 (0.82-1.00) | <0.001  |
| 2 FDG aDMN     | 0.83 (0.70-0.97) | <0.01   | FDG aDMN     | 0.71 (0.54-0.89) | 0.03    | FDG aDMN      | 0.92 (0.82-1.00) | <0.001  |
| 3 FDG PAR      | 0.80 (0.65-0.94) | <0.01   | FDG SAL      | 0.66 (0.49-0.84) | 0.09    | FDG SAL       | 0.88 (0.76-0.99) | <0.001  |
| 4 FDG SAL      | 0.76 (0.60-0.92) | <0.01   | FDG FTD      | 0.65 (0.46-0.83) | 0.13    | FDG PAR       | 0.79 (0.65-0.94) | <0.01   |
| 5 FDG TPC      | 0.75 (0.58-0.91) | 0.01    | MRI FTD      | 0.61 (0.46-0.76) | 0.17    | FDG TPC       | 0.76 (0.60-0.92) | 0.01    |
| bvAD vs. CN    |                  |         | tAD vs. CN   |                  |         | bvFTD vs. CN  |                  |         |
| Measure        | AUC (95% CI)     | p-value | Measure      | AUC (95% CI)     | p-value | Measure       | AUC (95% CI)     | p-value |
| 1 FDG TPC      | 0.93 (0.86-1.00) | <0.001  | FDG TPC      | 0.98 (0.94-1.00) | <0.001  | MRI FTD       | 0.93 (0.86-0.99) | <0.001  |
| 2 FDG PAR      | 0.91 (0.83-1.00) | <0.001  | MRI HIP      | 0.94 (0.89-0.99) | <0.001  | FDG aDMN      | 0.87 (0.73-1.00) | <0.001  |
| 3 MRI TPC      | 0.91 (0.83-0.99) | <0.001  | MRI TPC      | 0.94 (0.88-1.00) | <0.001  | FDG FTD       | 0.85 (0.72-0.99) | <0.001  |
| 4 FDG pDMN     | 0.90 (0.79-1.00) | <0.001  | MRI PAR      | 0.92 (0.85-0.99) | <0.001  | MRI TPC       | 0.81 (0.69-0.92) | <0.001  |
| 5 MRI PAR      | 0.89 (0.79-0.98) | <0.001  | FDG PAR      | 0.91 (0.81-1.00) | <0.001  | MRI HIP       | 0.80 (0.68-0.92) | <0.001  |

**Table S8.** Top-5 discriminating measures per contrast, with corresponding area-under-the-curve, 95% confidence intervals and significance levels.

*MRI FTD* = FTD signature region gray matter volume on MRI, consisting of the anterior cingulate, frontoinsula, striatum and frontopolar regions<sup>39, 40</sup>; *MRI AMYG* = bilateral amygdala gray matter volume on MRI; *MRI HIP* = bilateral hippocampus gray matter volume; *MRI PAR* = parietal gray matter volume; *MRI TPC* = temporoparietal gray matter volume; *FDG TPC* = temporoparietal cortex metabolism on FDG-PET; *FDG PAR* = parietal cortex metabolism on FDG-PET; *FDG pDMN* = glucose metabolism within the posterior default mode network, divided by the glucose metabolism without the posterior default mode network on FDG-PET; *FDG aDMN* = glucose metabolism within

the anterior default mode network, divided by the glucose metabolism without the anterior default mode network on FDG-PET; *FDG SAL* = glucose metabolism within the salience network, divided by the glucose metabolism without the salience network on FDG-PET.

| bvAD vs. bvFTD <sup>a</sup> |                  |         | bvAD vs. tAD <sup>b</sup> |                  |         | tAD vs. bvFTD <sup>c</sup> |                  |         |
|-----------------------------|------------------|---------|---------------------------|------------------|---------|----------------------------|------------------|---------|
| Measure                     | AUC (95% CI)     | p-value | Measure                   | AUC (95% CI)     | p-value | Measure                    | AUC (95% CI)     | p-value |
| 1 FDG pDMN                  | 0.89 (0.76-1.00) | <0.001  | MRI AMYG                  | 0.84 (0.71-0.98) | 0.001   | FDG aDMN                   | 0.94 (0.87-1.00) | <0.001  |
| 2 FDG aDMN                  | 0.86 (0.73-0.99) | <0.001  | FDG aDMN                  | 0.70 (0.52-0.89) | <0.05   | FDG pDMN                   | 0.92 (0.82-1.00) | <0.001  |
| 3 FDG SAL                   | 0.79 (0.63-0.94) | <0.01   | FDG SAL                   | 0.68 (0.50-0.87) | 0.07    | FDG SAL                    | 0.91 (0.81-1.00) | <0.001  |
| 4 FDG PAR                   | 0.77 (0.61-0.94) | <0.01   | FDG FTD                   | 0.62 (0.42-0.81) | 0.24    | FDG FTD                    | 0.81 (0.65-0.96) | <0.01   |
| 5 FDG FTD                   | 0.74 (0.57-0.91) | <0.05   | MRI FTD                   | 0.60 (0.40-0.80) | 0.33    | FDG PAR                    | 0.78 (0.63-0.94) | <0.01   |

**Table S9.** Top-5 discriminating measures per contrast for individuals with both MRI and FDG-PET data available, with corresponding area-under-the-curve, 95% confidence intervals and significance levels.

*Note:* only contrasts between patients vs. patients are shown, as no cognitively normal participant had both MRI and PET data available.

<sup>a</sup> n=16 for bvAD and n=17 for bvFTD

<sup>b</sup> n=16 for bvAD and n=18 for tAD

<sup>c</sup> n=18 for tAD and n=17 for bvFTD

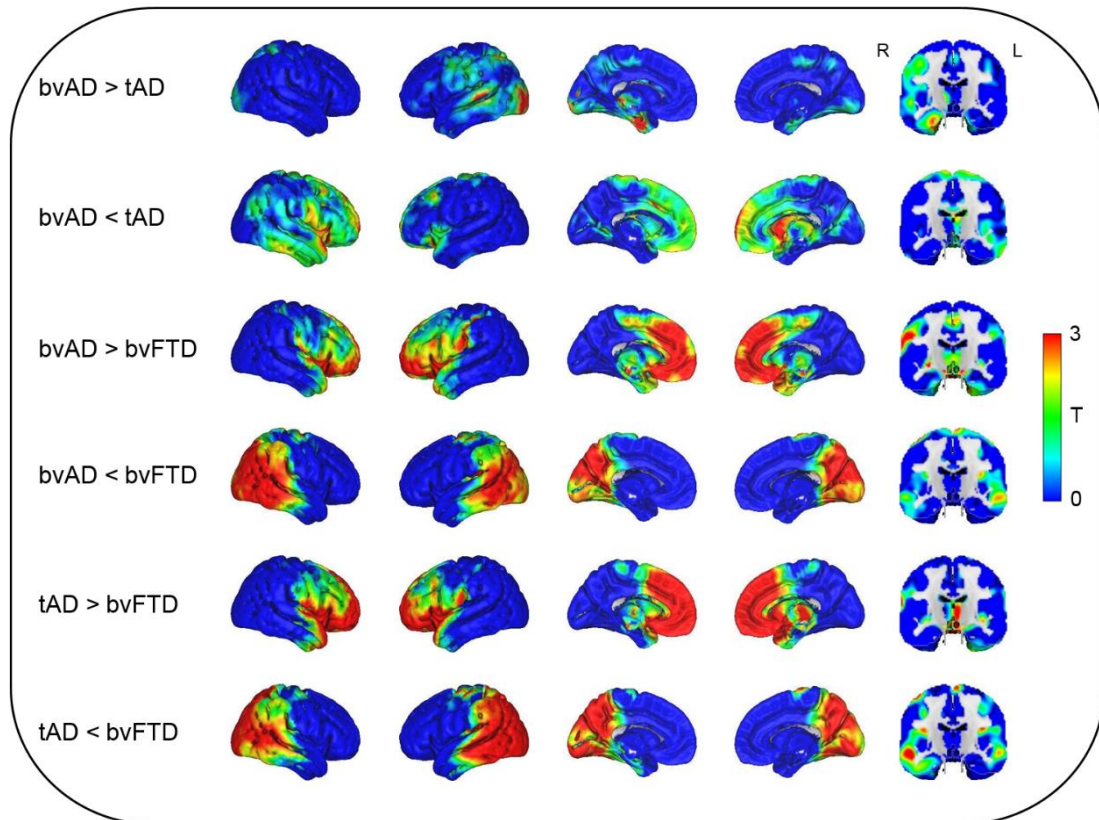

**Figure S1.** Patterns of hypometabolism resulting from contrasts between patient groups.

Surface rendering of *T*-maps resulting from showing hypometabolic regions in patients compared to other patient groups. Contrasts were adjusted for age and sex.

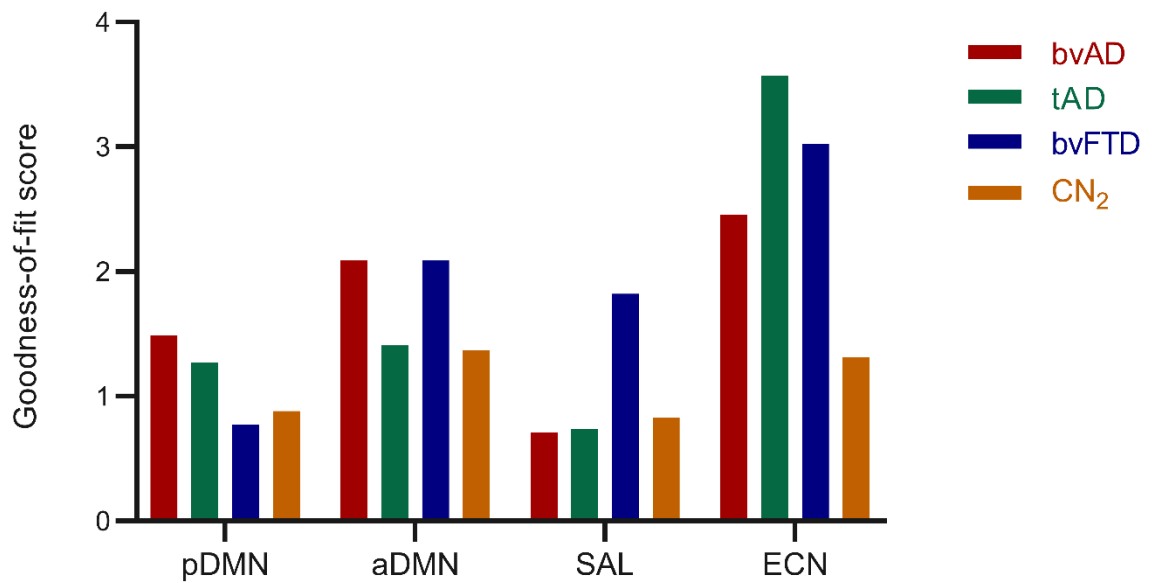

**Figure S2.** Goodness-of-fit (GOF) scores and ratios indicating the resemblance of the FDG interregional covariance maps with the functional network templates obtained from Neurosynth.org.

GOF scores represent the subtraction of the mean  $T$ -score outside of the network template from the mean  $T$ -score within the network template, and GOF ratios represent the division of the mean  $T$ -score inside the network template by the mean  $T$ -score outside the network template. *pDMN* = posterior default mode network, *aDMN* = anterior default mode network, *SAL* = salience network, *ECN* = executive control network.

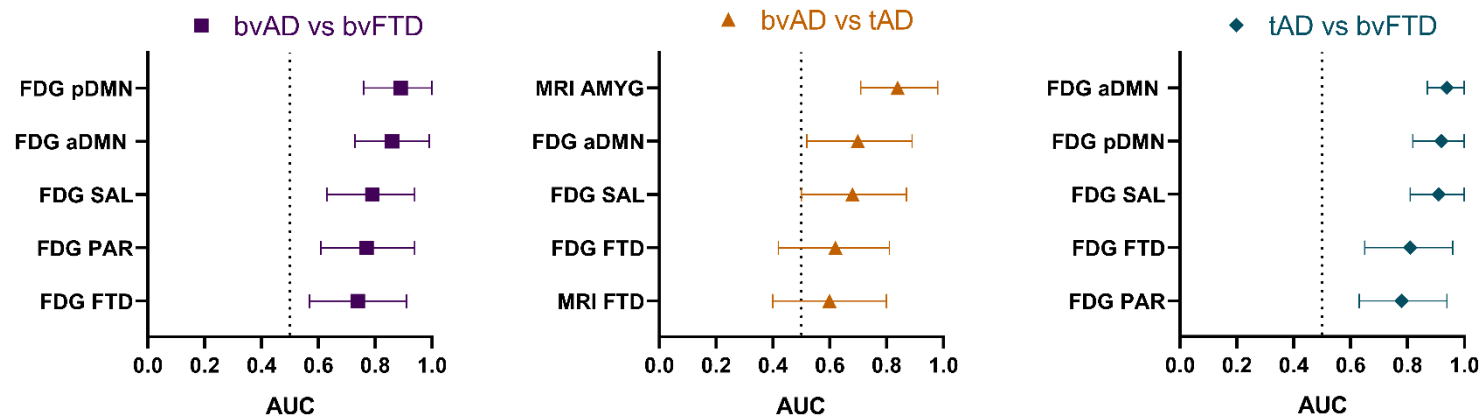

**Figure S3.** Top-5 discriminating measures per contrast for individuals with both MRI and FDG-PET data available, with corresponding area-under-the-curve, 95% confidence intervals and significance levels.

*Note:* only contrasts between patients vs. patients are shown, as none of the cognitively normal subjects had both MRI and PET data available.
